# Supplementary material for: From CdPb8(SeO3)4Br10 to Pb3(TeO3)Br4: the first tellurite bromide exhibiting an SHG response and mid-IR transparency
Source: Royal Society of Chemistry journal article supplement (doi:10.1039/d3qi01937c), 2023-01-01
Supplement: d3qi01937c1.pdf [file d3qi01937c1.pdf]

# From $\text{CdPb}_8(\text{SeO}_3)_4\text{Br}_{10}$ to $\text{Pb}_3(\text{TeO}_3)\text{Br}_4$ : the first tellurite bromide exhibiting an SHG response and mid-IR transparency

Peng-Fei Li<sup>a,b</sup>, Chun-Li Hu,<sup>a</sup> Bing-Xuan Li,<sup>a</sup> Jiang-Gao Mao<sup>a,b</sup>, Fang Kong<sup>\*,a,b</sup>

<sup>a</sup> State Key Laboratory of Structural Chemistry, Fujian Institute of Research on the Structure of Matter, Chinese Academy of Sciences, Fuzhou 350002, P. R. China.

<sup>b</sup> University of Chinese Academy of Sciences, Beijing 100049, P. R. China.

\*Corresponding Authors: kongfang@fjirsm.ac.cn

## Supporting Information

|                                                                                                                                                                                                                                                                                                                           |    |
|---------------------------------------------------------------------------------------------------------------------------------------------------------------------------------------------------------------------------------------------------------------------------------------------------------------------------|----|
| <b>Experimental Section</b> .....                                                                                                                                                                                                                                                                                         | 2  |
| <b>Computational Method</b> .....                                                                                                                                                                                                                                                                                         | 5  |
| <b>Table S1.</b> Summary of crystal data and structural refinements for $\text{CdPb}_8(\text{SeO}_3)_4\text{Br}_{10}$ and $\text{Pb}_3(\text{TeO}_3)\text{Br}_4$ .....                                                                                                                                                    | 6  |
| <b>Table S2.</b> Calculated bond valences of the $\text{CdPb}_8(\text{SeO}_3)_4\text{Br}_{10}$ and $\text{Pb}_3(\text{TeO}_3)\text{Br}_4$ . .....                                                                                                                                                                         | 7  |
| <b>Table S3.</b> Calculation of the dipole moments of some building blocks in $\text{CdPb}_8(\text{SeO}_3)_4\text{Br}_{10}$ and $\text{Pb}_3(\text{TeO}_3)\text{Br}_4$ (D = Debyes). .....                                                                                                                                | 9  |
| <b>Table S4.</b> The dipole moments of the polar units and the unit cell of $\text{Pb}_3(\text{TeO}_3)\text{Cl}_4$ and $\text{Pb}_3(\text{TeO}_3)\text{Br}_4$ (D = Debyes).....                                                                                                                                           | 10 |
| <b>Table S5.</b> State energies (eV) of the lowest conduction band (L-CB) and the highest valence band (H-VB) of $\text{CdPb}_8(\text{SeO}_3)_4\text{Br}_{10}$ and $\text{Pb}_3(\text{TeO}_3)\text{Br}_4$ . .....                                                                                                         | 12 |
| <b>Figure S1.</b> Simulated and experimental powder X-ray diffractometer patterns of $\text{CdPb}_8(\text{SeO}_3)_4\text{Br}_{10}$ (a), $\text{Pb}_3(\text{TeO}_3)\text{Br}_4$ (b) and Rietveld refinement plots of the powder XRD patterns for $\text{CdPb}_8(\text{SeO}_3)_4\text{Br}_{10}$ (c). .....                  | 13 |
| <b>Figure S2.</b> The $[\text{Cd}(\text{SeO}_3)_4]^{6-}$ unit (a), $\text{Pb}_4\text{O}_{12}\text{Br}_4$ tetramers (b), 3D network with four-membered polyhedral ring (4-MR) tunnels (c) and the 1D chain formed by the $[\text{Cd}(\text{SeO}_3)_4]^{6-}$ units and $\text{Pb}_4\text{O}_{12}\text{Br}_4$ tetramers(d).. | 14 |
| <b>Figure S3.</b> The lead bromide 3D skeletons (a), the 1D lead bromoxide 4-MR structures (b) and the lead tellurite chain (c) of $\text{Pb}_3(\text{TeO}_3)\text{Br}_4$ . .....                                                                                                                                         | 15 |
| <b>Figure S4.</b> TGA and DSC/DTA results of $\text{CdPb}_8(\text{SeO}_3)_4\text{Br}_{10}$ (a) and $\text{Pb}_3(\text{TeO}_3)\text{Br}_4$ (b). .....                                                                                                                                                                      | 16 |
| <b>Figure S5.</b> UV-vis-NIR diffuse-reflectance spectra of $\text{CdPb}_8(\text{SeO}_3)_4\text{Br}_{10}$ (a) and $\text{Pb}_3(\text{TeO}_3)\text{Br}_4$ (b).....                                                                                                                                                         | 17 |
| <b>Figure S6.</b> IR spectra of $\text{CdPb}_8(\text{SeO}_3)_4\text{Br}_{10}$ (a) and $\text{Pb}_3(\text{TeO}_3)\text{Br}_4$ (b).....                                                                                                                                                                                     | 18 |
| <b>Figure S7.</b> Band structures of $\text{CdPb}_8(\text{SeO}_3)_4\text{Br}_{10}$ (a) and $\text{Pb}_3(\text{TeO}_3)\text{Br}_4$ (b). .....                                                                                                                                                                              | 19 |
| <b>Figure S8.</b> Calculated refractive indices and birefringence of $\text{CdPb}_8(\text{SeO}_3)_4\text{Br}_{10}$ (a).....                                                                                                                                                                                               | 20 |
| <b>Figure S9.</b> Total and partial density of states of $\text{CdPb}_8(\text{SeO}_3)_4\text{Br}_{10}$ . .....                                                                                                                                                                                                            | 21 |
| <b>References</b> .....                                                                                                                                                                                                                                                                                                   | 22 |

## Experimental Section

### Reagents and Instruments

All the chemicals were obtained from commercial sources and used without further purification: SeO<sub>2</sub> (Adamas-beta, 99.999%), CdO (Adamas-beta, 99.0%+), TeO<sub>2</sub> (Adamas-beta, 99.99%), PbBr<sub>2</sub> (Adamas-beta, 99.9%) and HBr (Adamas-beta, 48%).

**Powder X-ray** diffraction (PXRD) patterns of the two compounds were collected on the Miniflex 600 powder X-ray diffractometer using Cu K $\alpha$  radiation ( $\lambda = 1.54186 \text{ \AA}$ ) at room temperature in the angular range of  $2\theta = 10\text{-}70^\circ$  with a scan step size of  $0.02^\circ$ .

**Microprobe elemental analysis** was carried out with the aid of a field-emission scanning electron microscope (JSM6700F) outfitted with an energy-dispersive X-ray spectroscope (Oxford INCA).

**IR spectra** were carried out on a Magna 750 FT-IR spectrometer using air as background in the range of  $4000\text{-}400 \text{ cm}^{-1}$  with a resolution of  $2 \text{ cm}^{-1}$  at room temperature. The samples used were polycrystalline powders of CdPb<sub>8</sub>(SeO<sub>3</sub>)<sub>4</sub>Br<sub>10</sub> and Pb<sub>3</sub>(TeO<sub>3</sub>)Br<sub>4</sub>.

**The UV-vis-NIR spectra** were obtained at  $2000\text{-}200 \text{ nm}$  by a PerkinElmer Lambda 900 spectrophotometer using BaSO<sub>4</sub> as the reference, and the reflection spectra were converted into an absorption spectrum using the Kubelka-Munk function. Absorption data was calculated from the diffuse reflection data by the Kubelka-Munk function:  $\alpha/S = (1-R)^2/2R$ , where  $\alpha$  and S represent the absorption coefficient and the scattering coefficient, respectively<sup>1</sup>. The band gap value can be given by extrapolating the absorption edge to the baseline in the  $\alpha/S$  vs. energy graph.

**Thermogravimetric analyses (TGA)** were measured by Netzsch STA 499C installation. The samples about  $3.0\text{-}5.0 \text{ mg}$  were placed in alumina crucibles and heated in  $20\text{-}1200 \text{ }^\circ\text{C}$  at a rate of  $15 \text{ }^\circ\text{C}/\text{min}$  under N<sub>2</sub> atmosphere.

**Powder SHG measurements** were conducted using a modified method of Kurtz and Perry<sup>2</sup>. Irradiation laser ( $\lambda = 1064 \text{ nm}$ ) is generated by a Nd:YAG solid-state laser equipped with a Q switch. The pure crystal samples of Pb<sub>3</sub>(TeO<sub>3</sub>)Br<sub>4</sub> was sieved according to  $150\text{-}210 \text{ }\mu\text{m}$  particle

size range.  $\text{KH}_2\text{PO}_4$  (KDP) samples in the same size range were also prepared and used as reference. The oscilloscope traces of SHG signals for  $\text{Pb}_3(\text{TeO}_3)\text{Br}_4$  and KDP samples in the particle size range (150–210  $\mu\text{m}$ ) were recorded.

**The LIDT measurements** of the  $\text{Pb}_3(\text{TeO}_3)\text{Br}_4$  crystal samples was performed by a Q-switched pulsed laser. The particle size range of the tested sample was 150–210  $\mu\text{m}$ , the laser wavelength was 1064 nm, the pulse duration was 10 ns, the pulse frequency was 1 Hz, and the laser spot area focused on the sample was 1.54  $\text{mm}^2$ . The energy of the laser emission was gradually increased during the measurement, and the LIDT of the sample was determined when it turned black under the laser.

**Single-crystal X-ray diffraction** data of  $\text{Pb}_3(\text{TeO}_3)\text{Br}_4$  was obtained on Agilent Technologies SuperNova dual-wavelength CCD diffractometer with a graphite-monochromated Mo  $\text{K}\alpha$  radiation ( $\lambda = 0.71073 \text{ \AA}$ ) at room temperature. Data reduction and cell refinement and were performed with *CrysAlisPro*. The structure was solved by the direct methods and refined by full-matrix least-squares fitting on  $F^2$  using *Olex2* crystallographic software package<sup>3,4</sup>. All the atoms were refined with anisotropic thermal parameters and finally converged for  $F_0^2 \geq 2\sigma(F_0^2)$ . The structural data were also checked for possible missing symmetry with the program *PLATON*, and no higher symmetry was found<sup>5</sup>. The detailed crystallographic data for the two compounds were given in Table S1. The bond lengths were listed in Table S2.

## Syntheses

**$\text{CdPb}_8(\text{SeO}_3)_4\text{Br}_{10}$**  was obtained by mild hydrothermal reactions. A mixture of  $\text{SeO}_2$  (333 mg, 3 mmol),  $\text{CdO}$  (128 mg, 1 mmol),  $\text{PbBr}_2$  (551 mg, 1.5 mmol), 0.25ml  $\text{HBr}$  and 4 ml  $\text{H}_2\text{O}$  were sealed in an autoclave containing Teflon liner equipped (23 ml), which were heated at 225  $^\circ\text{C}$  for 4320 minutes, and then cooled to room temperature at a rate of 1.5  $^\circ\text{C}/\text{h}$ . The products were separated by vacuum filtration, washed with alcohol and dried in air at room temperature. Transparent crystals  $\text{CdPb}_8(\text{SeO}_3)_4\text{Br}_{10}$  was obtained in yield of about 56% (based on Se) respectively. Its purity was confirmed by X-ray diffraction (XRD) and Rietveld refinement (Fig. S1).

**$\text{Pb}_3(\text{TeO}_3)\text{Br}_4$**  was obtained by mild hydrothermal reactions. A mixture of  $\text{TeO}_2$  (479 mg, 3 mmol),  $\text{PbBr}_2$  (1101 mg, 3 mmol) and 5 ml  $\text{H}_2\text{O}$  were sealed in an autoclave containing Teflon

liner equipped (23 ml), which were heated at 230 °C for 5760 minutes, and then cooled to room temperature at a rate of 3 °C/h. The products were separated by vacuum filtration, washed with alcohol and dried in air at room temperature. Transparent rod-shaped crystals  $\text{Pb}_3(\text{TeO}_3)\text{Br}_4$  was obtained in yield of about 11% (based on Se) respectively. Its purity was confirmed by X-ray diffraction (XRD) studies (Fig. S1).

## Computational Method

Single-crystal structural data of compounds  $\text{CdPb}_8(\text{SeO}_3)_4\text{Br}_{10}$  and  $\text{Pb}_3(\text{TeO}_3)\text{Br}_4$  were used for the theoretical calculations. The electronic structures were performed using a plane-wave basis set and pseudo-potentials within density functional theory (DFT) implemented in the total-energy code CASTEP<sup>6</sup>. For the exchange and correlation functional, we chose Perdew–Burke–Ernzerhof (PBE) in the generalized gradient approximation (GGA)<sup>7</sup>. The interactions between the ionic cores and the electrons were described by the ultrasoft pseudopotential<sup>8</sup>. The following valence-electron configurations were considered in the computation: Se-4s<sup>2</sup>4p<sup>4</sup>, Te-5s<sup>2</sup>5p<sup>4</sup>, Br-4s<sup>2</sup>4p<sup>5</sup>, Cd-4d<sup>10</sup>4p<sup>2</sup>5s<sup>2</sup>, Pb-5d<sup>10</sup>6p<sup>2</sup>6s<sup>2</sup> and O-2s<sup>2</sup>2p<sup>4</sup>. The numbers of plane waves included in the basis sets were determined by cutoff energy of 820 eV for  $\text{CdPb}_8(\text{SeO}_3)_4\text{Br}_{10}$  and  $\text{Pb}_3(\text{TeO}_3)\text{Br}_4$ . The numerical integration of the Brillouin zone was performed using Monkhorst-Pack k-point sampling of  $1 \times 3 \times 1$  and  $3 \times 2 \times 3$ . The other parameters and convergent criteria were the default values of CASTEP code.

The calculations of linear optical properties in terms of the complex dielectric function  $\epsilon(\omega) = \epsilon_1(\omega) + i\epsilon_2(\omega)$  were made. The imaginary part of the dielectric function  $\epsilon_2$  was given in the following equation:

$$\epsilon_2(\omega) = \frac{8\pi^2\hbar^2e^2}{(m^2V)} \sum_k \sum_{cv} (f_c - f_v) \frac{p_{cv}^i(k)p_{cv}^j(k)}{E_{vc}^2} \delta[E_c(k) - E_v(k) - \hbar\omega]$$

The  $f_c$  and  $f_v$  represent the Fermi distribution functions of the conduction and valence band. The term  $p_{cv}^i(k)$  denotes the momentum matrix element transition from the energy level  $c$  of the conduction band to the level  $v$  of the valence band at the  $k$ th point in the Brillouin zone (BZ), and  $V$  is the volume of the unit cell<sup>9-11</sup>.

The real part  $\epsilon_1(\omega)$  of the dielectric function  $\epsilon(\omega)$  follows from the Kramer–Kronig relationship. All the other optical constants may be derived from  $\epsilon_1(\omega)$  and  $\epsilon_2(\omega)$ . For example, the refractive index  $n(\omega)$  can be calculated using the following expression<sup>12</sup>:

$$n(\omega) = \frac{1}{\sqrt{2}} [\sqrt{\epsilon_1^2(\omega) + \epsilon_2^2(\omega)} + \epsilon_1(\omega)]^{1/2}$$

**Table S1.** Summary of crystal data and structural refinements for CdPb<sub>8</sub>(SeO<sub>3</sub>)<sub>4</sub>Br<sub>10</sub> and Pb<sub>3</sub>(TeO<sub>3</sub>)Br<sub>4</sub>.

| <b>molecular formula</b>                                                                                                      | <b>CdPb<sub>8</sub>(SeO<sub>3</sub>)<sub>4</sub>Br<sub>10</sub></b> | <b>Pb<sub>3</sub>(TeO<sub>3</sub>)Br<sub>4</sub></b> |
|-------------------------------------------------------------------------------------------------------------------------------|---------------------------------------------------------------------|------------------------------------------------------|
| Formula Weight                                                                                                                | 3076.86                                                             | 1116.81                                              |
| Crystal system                                                                                                                | monoclinic                                                          | orthorhombic                                         |
| Space group                                                                                                                   | <i>C2/c</i>                                                         | <i>Pna2<sub>1</sub></i>                              |
| Temperature(K)                                                                                                                | 292.31(10)                                                          | 293(2)                                               |
| F(000)                                                                                                                        | 5144.0                                                              | 1848.0                                               |
| a/Å                                                                                                                           | 17.9188(17)                                                         | 7.6928(2)                                            |
| b/Å                                                                                                                           | 9.6194(9)                                                           | 16.7016(4)                                           |
| c/Å                                                                                                                           | 17.9097(17)                                                         | 8.6092(2)                                            |
| α(deg)                                                                                                                        | 90                                                                  | 90                                                   |
| β(deg)                                                                                                                        | 92.999(9)                                                           | 90                                                   |
| γ(deg)                                                                                                                        | 90                                                                  | 90                                                   |
| V/Å <sup>3</sup>                                                                                                              | 3082.8(5)                                                           | 1106.13(5)                                           |
| Z                                                                                                                             | 4                                                                   | 4                                                    |
| Dc(g.cm <sup>-3</sup> )                                                                                                       | 6.629                                                               | 6.706                                                |
| Flack                                                                                                                         | /                                                                   | 0.013(12)                                            |
| GOF on F <sup>2</sup>                                                                                                         | 1.129                                                               | 1.059                                                |
| R <sub>1</sub> , wR <sub>2</sub> [I > 2σ(I)] <sup>a</sup>                                                                     | R <sub>1</sub> = 0.0406, wR <sub>2</sub> = 0.0790                   | R <sub>1</sub> = 0.0286, wR <sub>2</sub> = 0.0696    |
| R <sub>1</sub> , wR <sub>2</sub> (all data) <sup>a</sup>                                                                      | R <sub>1</sub> = 0.0554, wR <sub>2</sub> = 0.0846                   | R <sub>1</sub> = 0.0309, wR <sub>2</sub> = 0.0706    |
| <sup>a</sup> $R_1 = \sum   F_o  -  F_c   / \sum  F_o $ , $wR_2 = \{ \sum w[(F_o)^2 - (F_c)^2]^2 / \sum w[(F_o)^2]^2 \}^{1/2}$ |                                                                     |                                                      |

**Table S2.** Calculated bond valences of the CdPb<sub>8</sub>(SeO<sub>3</sub>)<sub>4</sub>Br<sub>10</sub> and Pb<sub>3</sub>(TeO<sub>3</sub>)Br<sub>4</sub>.

| Compound                                                            | Bond      | Bond    | Bond-valence   | BVS            |
|---------------------------------------------------------------------|-----------|---------|----------------|----------------|
|                                                                     |           | lengths |                |                |
| CdPb <sub>8</sub> (SeO <sub>3</sub> ) <sub>4</sub> Br <sub>10</sub> | Se1-O1    | 1.702   | 1.343          | 3.922          |
|                                                                     | Se1-O2    | 1.736   | 1.225          |                |
|                                                                     | Se1-O3    | 1.699   | 1.354          |                |
|                                                                     | Se2-O4    | 1.692   | 1.379          | 4.036          |
|                                                                     | Se2-O5    | 1.705   | 1.332          |                |
|                                                                     | Se2-O6    | 1.707   | 1.325          |                |
|                                                                     | Pb1-Br3#1 | 3.193   | 0.224          | 1.492<br>1.885 |
|                                                                     | Pb1-O1#2  | 2.611   | 0.260          |                |
|                                                                     | Pb1-O1#3  | 2.659   | 0.228          |                |
|                                                                     | Pb1-O2#3  | 2.613   | 0.258          |                |
|                                                                     | Pb1-O3#2  | 2.698   | 0.205          |                |
|                                                                     | Pb1-O4    | 2.537   | 0.317          |                |
|                                                                     | Pb1-Br4   | 3.384   | 0.134          |                |
|                                                                     | Pb1-Br5   | 3.347   | 0.148          |                |
|                                                                     | Pb1-Br5   | 3.454   | 0.111          |                |
|                                                                     | Pb2-Br1#4 | 3.121   | 0.304          |                |
|                                                                     | Pb2-O1#2  | 2.606   | 0.263          |                |
|                                                                     | Pb2-O4#5  | 2.694   | 0.207          |                |
|                                                                     | Pb2-O4    | 2.641   | 0.239          |                |
|                                                                     | Pb2-O5    | 2.660   | 0.227          |                |
|                                                                     | Pb2-O6#5  | 2.590   | 0.275          |                |
|                                                                     | Pb2-Br1   | 3.35    | 0.147          |                |
|                                                                     | Pb2-Br2   | 3.302   | 0.167          |                |
|                                                                     | Pb2-Br3   | 3.502   | 0.097          |                |
|                                                                     | Pb3-Br1   | 3.106   | 0.284          | 2.039          |
|                                                                     | Pb3-Br2   | 3.022   | 0.356          |                |
|                                                                     | Pb3-Br3   | 3.148   | 0.253          |                |
|                                                                     | Pb3-Br3#6 | 3.155   | 0.249          |                |
|                                                                     | Pb3-Br4   | 3.113   | 0.278          |                |
|                                                                     | Pb3-Br5#5 | 3.162   | 0.244          |                |
|                                                                     | Pb3-O3    | 2.729   | 0.189          |                |
|                                                                     | Pb3-O5    | 2.734   | 0.186          |                |
| Pb4-Br1                                                             | 3.178     | 0.234   | 1.553<br>1.982 |                |
| Pb4-Br4#7                                                           | 3.130     | 0.266   |                |                |
| Pb4-Br5                                                             | 3.067     | 0.315   |                |                |
| Pb4-O2                                                              | 2.534     | 0.320   |                |                |
| Pb4-O6#5                                                            | 2.435     | 0.418   |                |                |

|                                                    |         |           |           |       |                |       |                |
|----------------------------------------------------|---------|-----------|-----------|-------|----------------|-------|----------------|
|                                                    | Pb4-Br2 | 3.404     | 0.172     |       |                |       |                |
|                                                    | Pb4-Br2 | 3.502     | 0.097     |       |                |       |                |
|                                                    | Pb4-Br4 | 3.317     | 0.160     |       |                |       |                |
|                                                    |         | Cd1-O2    | 2.617     | 0.146 | 1.744          |       |                |
|                                                    |         | Cd1-O2#5  | 2.617     | 0.146 |                |       |                |
|                                                    |         | Cd1-O3    | 2.296     | 0.347 |                |       |                |
|                                                    |         | Cd1-O3#5  | 2.296     | 0.347 |                |       |                |
|                                                    |         | Cd1-O5    | 2.263     | 0.379 |                |       |                |
|                                                    |         | Cd1-O5#5  | 2.263     | 0.379 |                |       |                |
| Pb <sub>3</sub> (TeO <sub>3</sub> )Br <sub>4</sub> |         | Te1-O1    | 1.866     | 1.350 |                | 3.984 |                |
|                                                    |         | Te1-O2    | 1.891     | 1.262 |                |       |                |
|                                                    | Te1-O3  | 1.860     | 1.372     |       |                |       |                |
|                                                    |         | Pb1-Br1   | 2.942     | 0.442 | 1.797<br>1.967 |       |                |
|                                                    |         | Pb1-Br2   | 3.131     | 0.265 |                |       |                |
|                                                    |         | Pb1-Br3#1 | 3.189     | 0.227 |                |       |                |
|                                                    |         | Pb1-O1#1  | 2.394     | 0.467 |                |       |                |
|                                                    |         | Pb1-O2    | 2.455     | 0.396 |                |       |                |
|                                                    |         | Pb1-Br2   | 3.282     | 0.176 |                |       |                |
|                                                    |         | Pb1-Br3   | 3.297     | 0.169 |                |       |                |
|                                                    |         |           | Pb2-Br2   | 3.100 |                | 0.288 | 1.844<br>1.943 |
|                                                    |         |           | Pb2-Br2#3 | 3.179 |                | 0.233 |                |
|                                                    |         |           | Pb2-Br3#3 | 3.195 |                | 0.223 |                |
|                                                    | Pb2-Br3 |           | 3.161     | 0.245 |                |       |                |
|                                                    | Pb2-Br4 |           | 2.938     | 0.447 |                |       |                |
|                                                    | Pb2-O3  |           | 2.444     | 0.408 |                |       |                |
|                                                    | Pb2-O2  |           | 2.966     | 0.099 |                |       |                |
|                                                    |         | Pb3-Br1#4 | 3.030     | 0.349 | 1.640<br>1.948 |       |                |
|                                                    |         | Pb3-Br3#3 | 3.230     | 0.203 |                |       |                |
|                                                    |         | Pb3-O1#4  | 2.581     | 0.282 |                |       |                |
|                                                    |         | Pb3-O2#4  | 2.543     | 0.312 |                |       |                |
| Pb3-O3                                             |         | 2.373     | 0.494     |       |                |       |                |
| Pb3-Br4                                            |         | 3.256     | 0.189     |       |                |       |                |
| Pb3-Br4                                            |         | 3.427     | 0.119     |       |                |       |                |

Green font: Longer secondary bonds are considered.

Symmetry transformations used to generate equivalent atoms:

For CdPb<sub>8</sub>(SeO<sub>3</sub>)<sub>4</sub>Br<sub>10</sub>: #1 X,1-Y,1/2+Z; #2 +X,1+Y,+Z; #3 1-X,1+Y,3/2-Z; #4 1-X,1-Y,1-Z;  
#5 1-X,+Y,3/2-Z; #6 3/2-X,1/2-Y,1-Z; #7 -1/2+X,1/2+Y,+Z

For Pb<sub>3</sub>(TeO<sub>3</sub>)Br<sub>4</sub>: #1 +X,+Y,-1+Z; #2 1-X,1-Y,-1/2+Z; #3 -1/2+X,1/2-Y,+Z; #4 1-X,1-Y,1/2+Z; #5 +X,+Y,1+Z; #6 1/2+X,1/2-Y,+Z



**Table S3.** Calculation of the dipole moments of some building blocks in  $\text{CdPb}_8(\text{SeO}_3)_4\text{Br}_{10}$  and  $\text{Pb}_3(\text{TeO}_3)\text{Br}_4$  (D = Debyes).

| $\text{CdPb}_8(\text{SeO}_3)_4\text{Br}_{10}$                                       |                                                                        |                   |             |             |             |
|-------------------------------------------------------------------------------------|------------------------------------------------------------------------|-------------------|-------------|-------------|-------------|
| Polar unit                                                                          |                                                                        | Dipole moment (D) |             |             |             |
| Building Blocks                                                                     | total magnitude                                                        | total magnitude   | x-component | y-component | z-component |
| 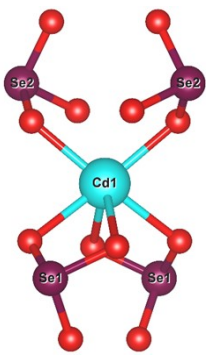   | Se(1)O <sub>3</sub>                                                    | 10.223            | -0.745      | 0.644       | 10.176      |
|                                                                                     | Se(1)O <sub>3</sub>                                                    | 10.223            | 0.745       | 0.644       | -10.176     |
|                                                                                     | Se(2)O <sub>3</sub>                                                    | 10.414            | -10.344     | -0.211      | 1.189       |
|                                                                                     | Se(2)O <sub>3</sub>                                                    | 10.414            | 10.344      | -0.211      | -1.189      |
|                                                                                     | Net dipole moment of (SeO <sub>3</sub> ) <sub>4</sub>                  | 0.866             | 0           | 0.866       | 0           |
|                                                                                     | Cd(1)O <sub>6</sub>                                                    | 5.245             | 0.000       | 5.245       | 0.000       |
|                                                                                     | Net dipole moment of Cd(SeO <sub>3</sub> ) <sub>4</sub>                | 3.597             | 0           | 3.597       | 0           |
|   | Cd(1)O <sub>6</sub>                                                    | 4.379             | 0.000       | 4.379       | 0.000       |
|                                                                                     | Pb(3)O <sub>2</sub> Br <sub>6</sub>                                    | 4.417             | 3.364       | -0.757      | -2.760      |
|                                                                                     | Pb(3)O <sub>2</sub> Br <sub>6</sub>                                    | 4.417             | -3.364      | -0.757      | 2.760       |
|                                                                                     | Pb(4)O <sub>2</sub> Br <sub>3</sub>                                    | 14.014            | 3.370       | -6.258      | 12.078      |
|                                                                                     | Pb(4)O <sub>2</sub> Br <sub>3</sub>                                    | 14.014            | -3.370      | -6.259      | -12.078     |
|                                                                                     | Net dipole moment of CdPb <sub>4</sub> O <sub>6</sub> Br <sub>14</sub> | 9.652             | 0.000       | -9.652      | 0.000       |
|  | Pb(1)O <sub>5</sub> Br                                                 | 13.556            | 10.066      | -2.575      | -8.708      |
|                                                                                     | Pb(1)O <sub>5</sub> Br                                                 | 13.556            | -10.066     | -2.575      | 8.708       |
|                                                                                     | Pb(2)O <sub>5</sub> Br                                                 | 4.311             | 0.377       | 3.130       | -2.941      |
|                                                                                     | Pb(2)O <sub>5</sub> Br                                                 | 4.311             | -0.377      | 3.130       | 2.941       |
|                                                                                     | Net dipole moment of Pb <sub>4</sub> O <sub>12</sub> Br <sub>4</sub>   | 6.260             | 0.000       | 6.259       | 0.000       |
| $\text{Pb}_3(\text{TeO}_3)\text{Br}_4$                                              |                                                                        |                   |             |             |             |
|  | Te(1)O <sub>3</sub>                                                    | 11.884            | 10.499      | -0.433      | 5.550       |
|                                                                                     | Te(1)O <sub>3</sub>                                                    | 11.884            | -10.499     | 0.432       | 5.552       |
|                                                                                     | Net dipole moment of (TeO <sub>3</sub> ) <sub>2</sub>                  | 11.10             | 0           | 0           | 11.102      |
|  | Pb(1)O <sub>2</sub> Br <sub>5</sub>                                    | 6.181             | -4.857      | 3.802       | -0.391      |
|                                                                                     | Pb(1)O <sub>2</sub> Br <sub>5</sub>                                    | 6.181             | 4.857       | -3.802      | -0.391      |
|                                                                                     | Pb(2)OBr <sub>5</sub>                                                  | 4.703             | 2.590       | -3.913      | 0.312       |
|                                                                                     | Pb(2)OBr <sub>5</sub>                                                  | 4.703             | -2.590      | 3.913       | 0.312       |
|                                                                                     | Pb(3)O <sub>3</sub> Br <sub>4</sub>                                    | 8.052             | -0.769      | 0.667       | -7.987      |
|                                                                                     | Pb(3)O <sub>3</sub> Br <sub>4</sub>                                    | 8.052             | 0.769       | -0.667      | -7.987      |
|                                                                                     | Net dipole moment of this unit                                         | 16.133            | 0           | 0           | -16.133     |

**Table S4.** The dipole moments of the polar units and the unit cell of  $\text{Pb}_3(\text{TeO}_3)\text{Cl}_4$  and  $\text{Pb}_3(\text{TeO}_3)\text{Br}_4$  (D = Debyes).

| $\text{Pb}_3(\text{TeO}_3)\text{Cl}_4$                   |                   |             |             |             |
|----------------------------------------------------------|-------------------|-------------|-------------|-------------|
| Polar unit                                               | Dipole moment (D) |             |             |             |
|                                                          | total magnitude   | x-component | y-component | z-component |
| Te(1)O <sub>3</sub>                                      | 12.833            | 11.353      | 0.056       | 5.982       |
|                                                          | 12.824            | 11.344      | -0.056      | 5.981       |
|                                                          | 12.822            | -11.343     | 0.0564      | 5.979       |
|                                                          | 12.832            | -11.353     | -0.056      | 5.982       |
| Net dipole moment of Te(1)O <sub>3</sub>                 | 23.925            | 0.001       | 0.001       | 23.925      |
| Pb(1)O <sub>3</sub> Cl <sub>4</sub>                      | 9.509             | -5.089      | 1.093       | -7.957      |
|                                                          | 9.508             | 5.089       | 1.092       | -7.957      |
|                                                          | 9.509             | 5.089       | -1.094      | -7.958      |
|                                                          | 9.509             | -5.089      | -1.094      | -7.958      |
| Net dipole moment of Pb(1)O <sub>3</sub> Cl <sub>4</sub> | 31.831            | 0           | -0.003      | -31.831     |
| Pb(2)OCl <sub>5</sub>                                    | 2.098             | 2.097       | -0.030      | -0.054      |
|                                                          | 2.098             | 2.097       | 0.030       | -0.054      |
|                                                          | 2.098             | -2.097      | 0.030       | -0.054      |
|                                                          | 2.098             | -2.097      | -0.030      | -0.054      |
| Net dipole moment of Pb(2)OCl <sub>5</sub>               | 0.218             | 0           | 0           | -0.218      |
| Pb(3)O <sub>2</sub> Cl <sub>5</sub>                      | 5.135             | -4.585      | 2.308       | -0.138      |
|                                                          | 5.135             | -4.585      | -2.308      | -0.138      |
|                                                          | 5.136             | 4.586       | -2.308      | -0.140      |
|                                                          | 5.136             | 4.586       | 2.308       | -0.140      |
| Net dipole moment of Pb(3)O <sub>2</sub> Cl <sub>5</sub> | 0.556             | 0.002       | 0           | -0.556      |
| Net dipole moment (a unit cell)                          | 8.680             | -0.418      | -0.002      | -8.722      |
| $\text{Pb}_3(\text{TeO}_3)\text{Br}_4$                   |                   |             |             |             |
| Polar unit                                               | Dipole moment (D) |             |             |             |
|                                                          | total magnitude   | x-component | y-component | z-component |
| Te(1)O <sub>3</sub>                                      | 11.888            | 10.503      | 0.431       | 5.552       |
|                                                          | 11.884            | 10.499      | -0.433      | 5.550       |
|                                                          | 11.884            | -10.499     | 0.432       | 5.552       |
|                                                          | 11.889            | -10.503     | -0.431      | 5.554       |
| Net dipole moment of Te(1)O <sub>3</sub>                 | 22.208            | 0           | 0           | 22.208      |
| Pb(1)O <sub>2</sub> Br <sub>5</sub>                      | 6.181             | 4.857       | 3.802       | -0.391      |
|                                                          | 6.181             | 4.857       | -3.802      | -0.391      |
|                                                          | 6.181             | -4.857      | 3.802       | -0.391      |
|                                                          | 6.181             | -4.857      | -3.802      | -0.391      |
| Net dipole moment of Pb(1)O <sub>2</sub> Br <sub>5</sub> | 1.565             | 0           | 0           | -1.565      |
| Pb(2)OBr <sub>5</sub>                                    | 4.701             | 2.590       | 3.911       | 0.312       |
|                                                          | 4.701             | 2.590       | -3.911      | 0.312       |

|                                                          |        |        |        |         |
|----------------------------------------------------------|--------|--------|--------|---------|
|                                                          | 4.701  | -2.590 | 3.911  | 0.312   |
|                                                          | 4.701  | -2.590 | -3.911 | 0.312   |
| Net dipole moment of Pb(2)OBr <sub>5</sub>               | 1.248  | 0      | 0      | 1.248   |
| Pb(3)O <sub>3</sub> Br <sub>4</sub>                      | 8.053  | -0.772 | -0.665 | -7.988  |
|                                                          | 8.053  | -0.772 | 0.665  | -7.988  |
|                                                          | 8.053  | 0.772  | -0.665 | -7.988  |
|                                                          | 8.053  | 0.772  | 0.665  | -7.988  |
| Net dipole moment of Pb(3)O <sub>3</sub> Br <sub>4</sub> | 32.271 | 0      | 0      | -32.271 |
| Net dipole moment (a unit cell)                          | 10.062 | 0      | 0      | -10.062 |

**Table S5.** State energies (eV) of the lowest conduction band (L-CB) and the highest valence band (H-VB) of  $\text{CdPb}_8(\text{SeO}_3)_4\text{Br}_{10}$  and  $\text{Pb}_3(\text{TeO}_3)\text{Br}_4$ .

| Compound                                      | k-point                  | L-CB     | H-VB     |
|-----------------------------------------------|--------------------------|----------|----------|
| $\text{CdPb}_8(\text{SeO}_3)_4\text{Br}_{10}$ | Z (0.000, 0.000, 0.500)  | 3.011678 | -0.18565 |
|                                               | G (0.000, 0.000, 0.000)  | 2.954599 | -0.15266 |
|                                               | Y (0.000, 0.500, 0.000)  | 2.967506 | -0.00769 |
|                                               | A (-0.500, 0.500, 0.000) | 3.129502 | -0.00064 |
|                                               | B (-0.500, 0.000, 0.000) | 3.058268 | -0.21462 |
|                                               | D (-0.500, 0.000, 0.500) | 3.045194 | -0.24492 |
|                                               | E (-0.500, 0.500, 0.500) | 3.083478 | 0        |
|                                               | C (0.000, 0.500, 0.500)  | 3.133588 | -0.03147 |
| $\text{Pb}_3(\text{TeO}_3)\text{Br}_4$        | G (0.000, 0.000, 0.000)  | 3.134203 | 0        |
|                                               | Z (0.000, 0.000, 0.500)  | 3.401155 | -0.11537 |
|                                               | T (-0.500, 0.000, 0.500) | 3.298867 | -0.11899 |
|                                               | Y (-0.500, 0.000, 0.000) | 3.458111 | -0.02856 |
|                                               | S (-0.500, 0.500, 0.000) | 3.532037 | -0.0913  |
|                                               | X (0.000, 0.500, 0.000)  | 3.149716 | -0.04157 |
|                                               | U (0.000, 0.500, 0.500)  | 3.438794 | -0.11292 |
|                                               | R (-0.500, 0.500, 0.500) | 3.295515 | -0.07356 |

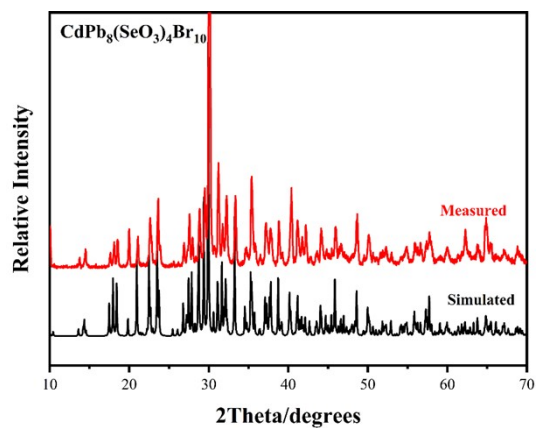

(a)

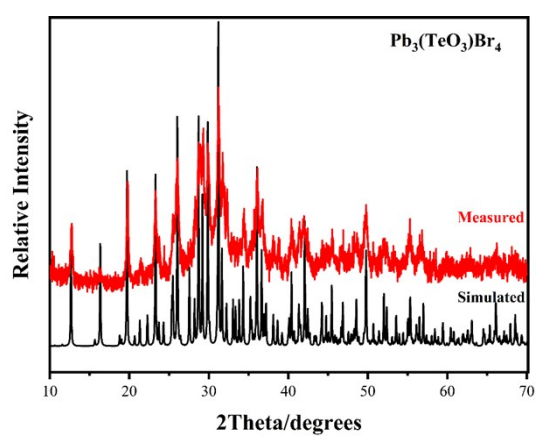

(b)

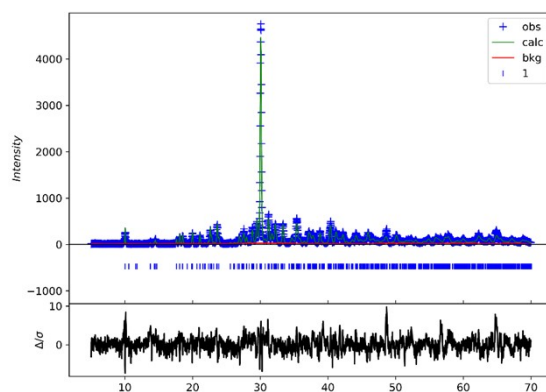

(c)

**Figure S1.** Simulated and experimental powder X-ray diffractometer patterns of CdPb<sub>8</sub>(SeO<sub>3</sub>)<sub>4</sub>Br<sub>10</sub> (a), Pb<sub>3</sub>(TeO<sub>3</sub>)Br<sub>4</sub> (b) and Rietveld refinement plots of the powder XRD patterns for CdPb<sub>8</sub>(SeO<sub>3</sub>)<sub>4</sub>Br<sub>10</sub> (c).

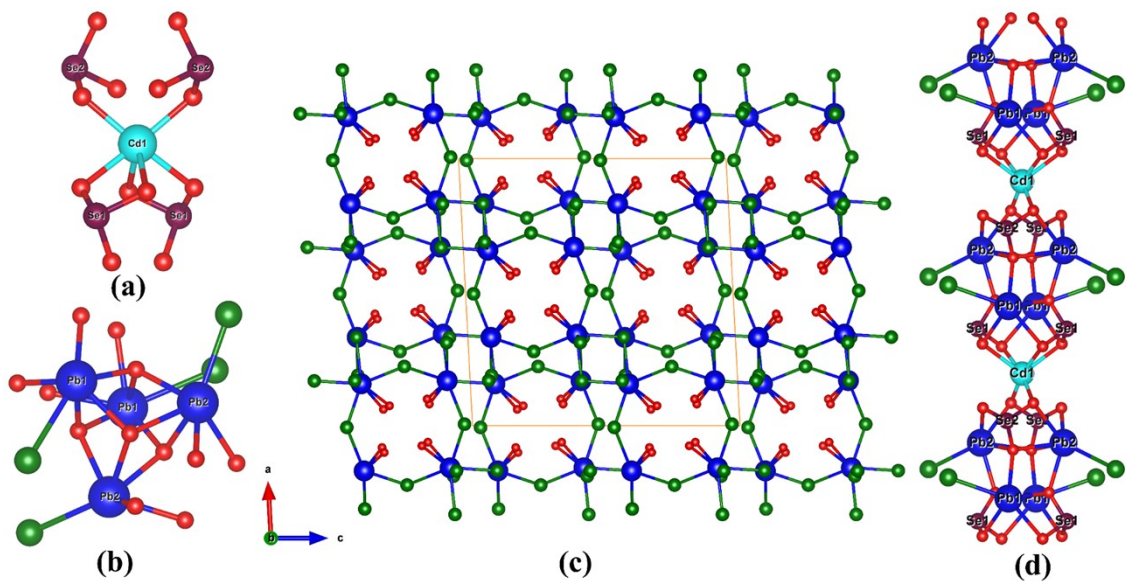

**Figure S2.** The  $[\text{Cd}(\text{SeO}_3)_4]^{6-}$  unit (a),  $\text{Pb}_4\text{O}_{12}\text{Br}_4$  tetramers (b), 3D network with four-membered polyhedral ring (4-MR) tunnels (c) and the 1D chain formed by the  $[\text{Cd}(\text{SeO}_3)_4]^{6-}$  units and  $\text{Pb}_4\text{O}_{12}\text{Br}_4$  tetramers(d).

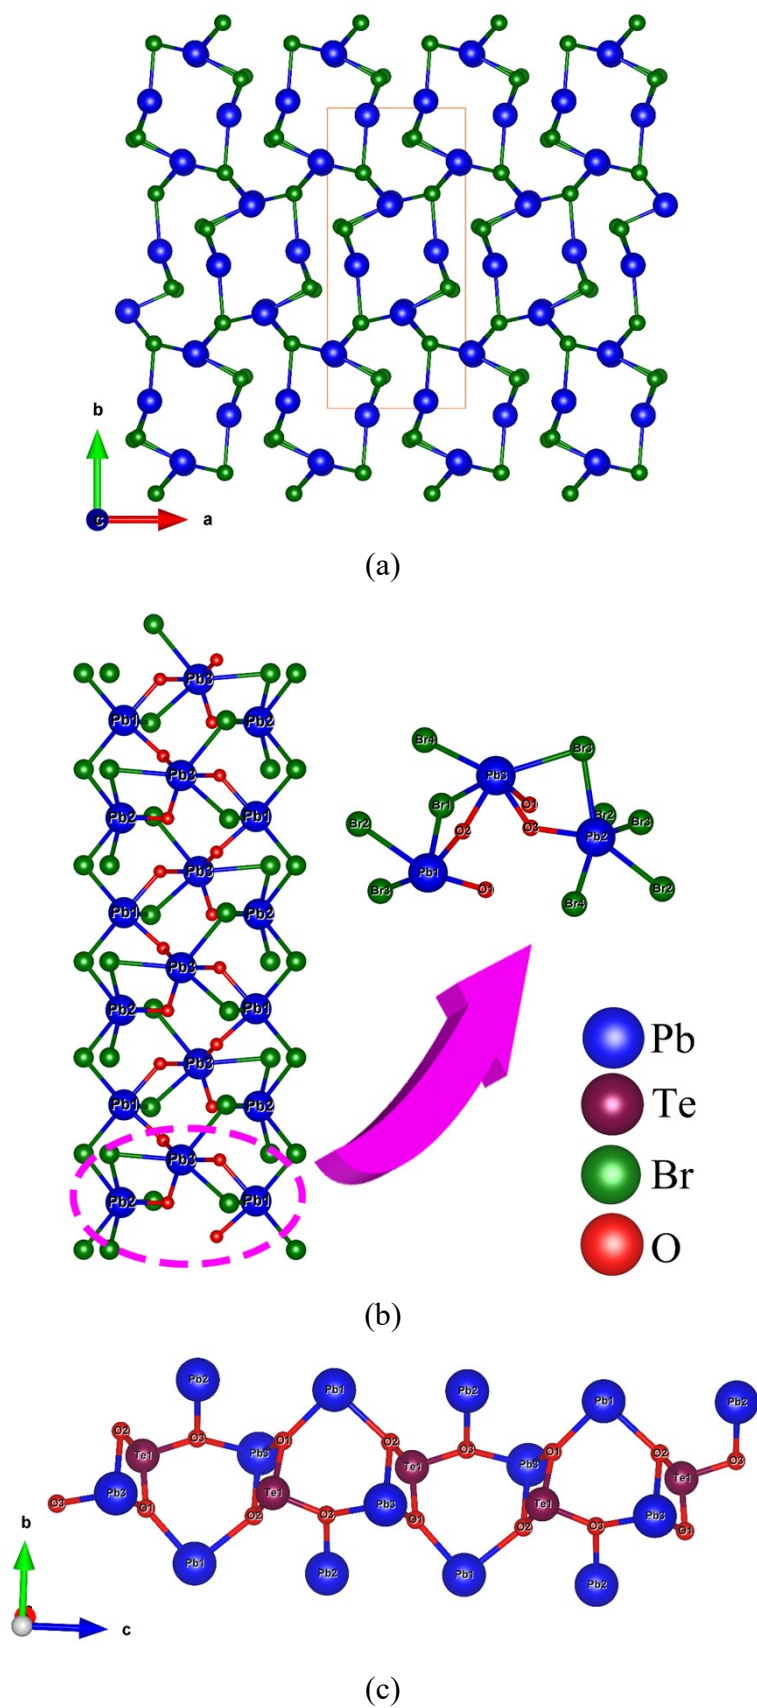

**Figure S3.** The lead bromide 3D skeletons (a), the 1D lead bromoxide 4-MR structures (b) and the lead tellurite chain (c) of  $\text{Pb}_3(\text{TeO}_3)\text{Br}_4$ .

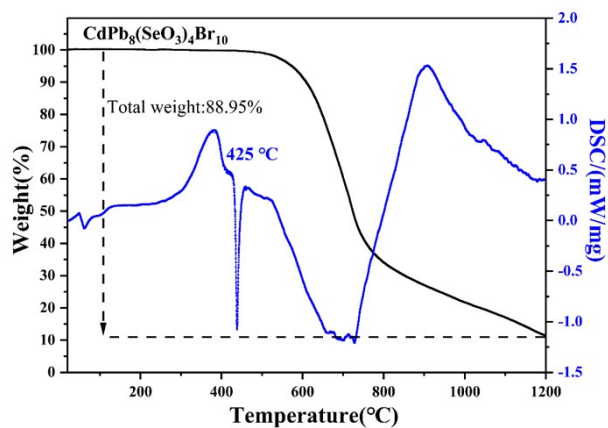

(a)

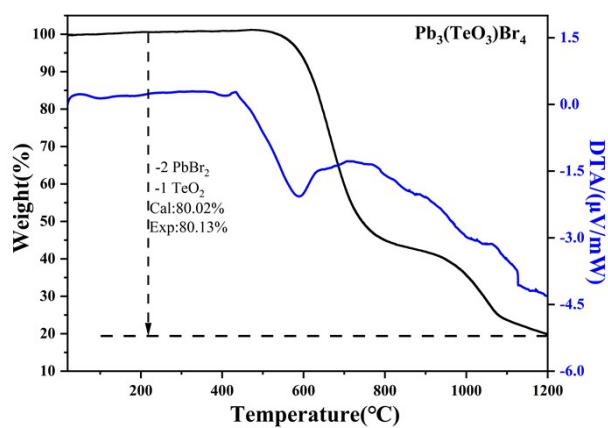

(b)

**Figure S4.** TGA and DSC/DTA results of CdPb<sub>8</sub>(SeO<sub>3</sub>)<sub>4</sub>Br<sub>10</sub> (a) and Pb<sub>3</sub>(TeO<sub>3</sub>)Br<sub>4</sub> (b).



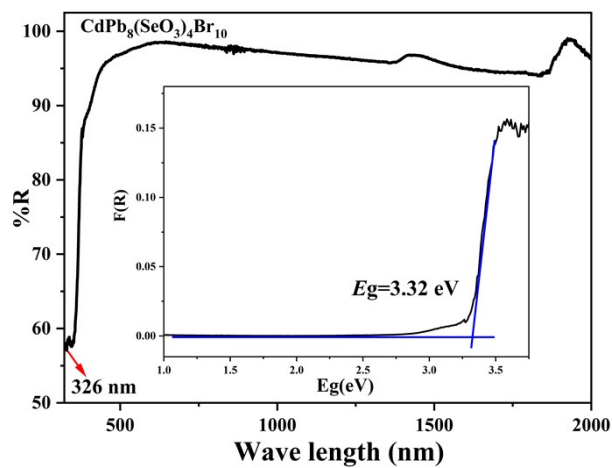

(a)

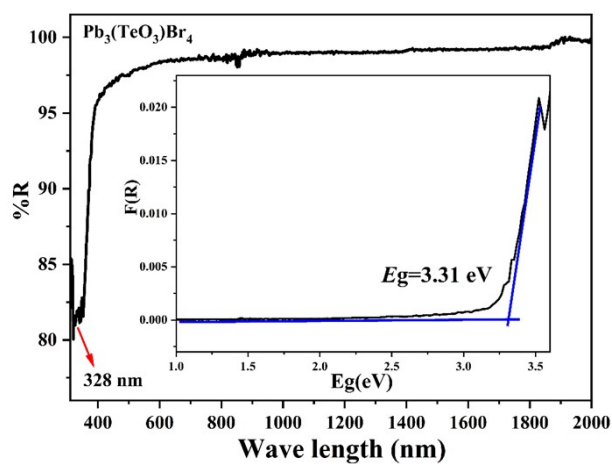

(b)

**Figure S5.** UV-vis-NIR diffuse-reflectance spectra of CdPb<sub>8</sub>(SeO<sub>3</sub>)<sub>4</sub>Br<sub>10</sub> (a) and Pb<sub>3</sub>(TeO<sub>3</sub>)Br<sub>4</sub> (b).

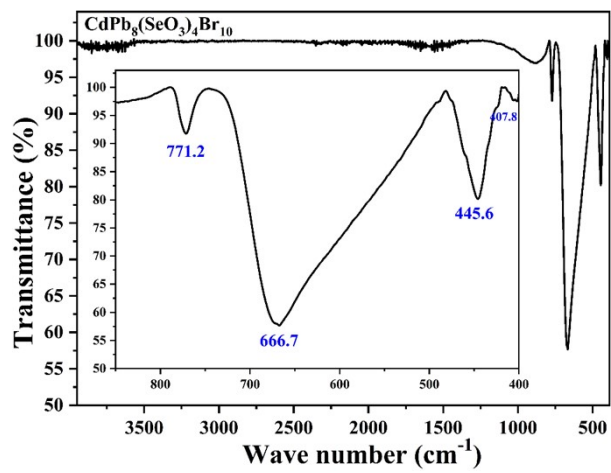

(a)

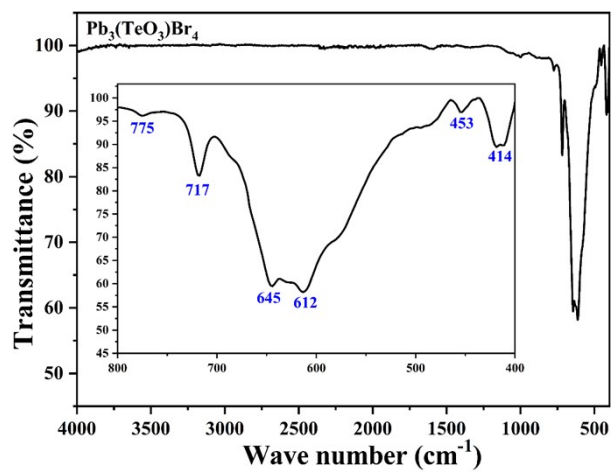

(b)

**Figure S6.** IR spectra of CdPb<sub>8</sub>(SeO<sub>3</sub>)<sub>4</sub>Br<sub>10</sub> (a) and Pb<sub>3</sub>(TeO<sub>3</sub>)Br<sub>4</sub> (b).

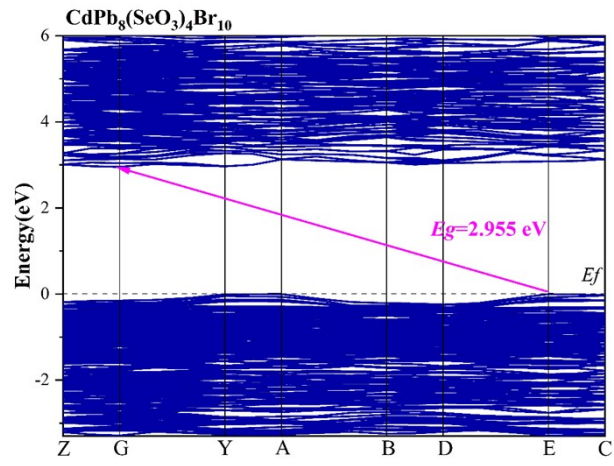

(a)

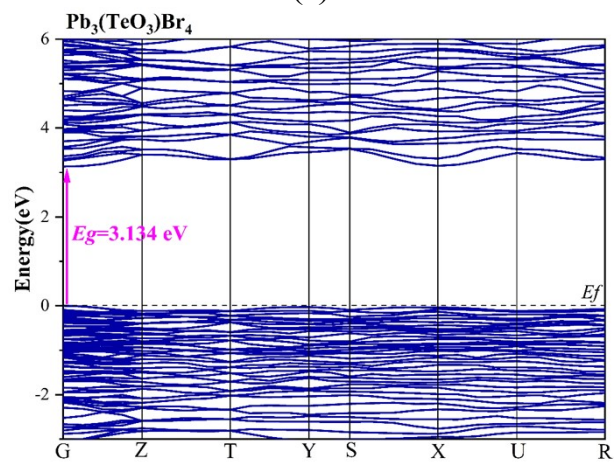

(b)

**Figure S7.** Band structures of CdPb<sub>8</sub>(SeO<sub>3</sub>)<sub>4</sub>Br<sub>10</sub> (a) and Pb<sub>3</sub>(TeO<sub>3</sub>)Br<sub>4</sub> (b).

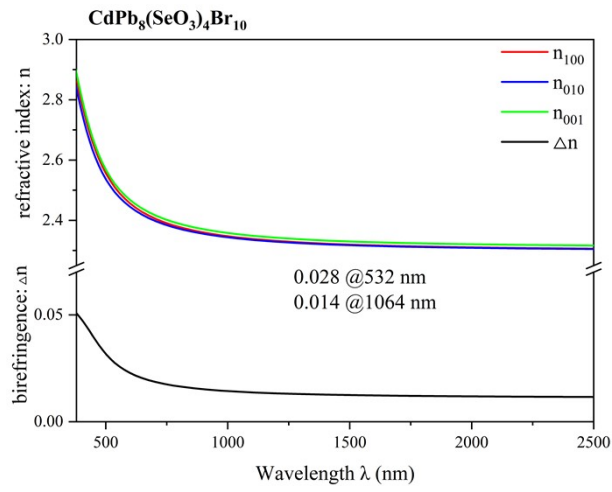

**Figure S8.** Calculated refractive indices and birefringence of CdPb<sub>8</sub>(SeO<sub>3</sub>)<sub>4</sub>Br<sub>10</sub> (a).

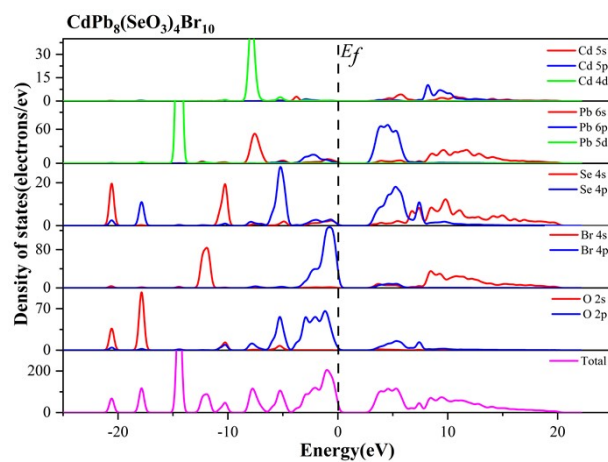

**Figure S9.** Total and partial density of states of  $\text{CdPb}_8(\text{SeO}_3)_4\text{Br}_{10}$ .

## References

1. P. Kubelka and F. Munk, An Article on Optics of Paint Layers, *Technol. Physical* 1931, **12**, 259–274.
2. S. K. Kurtz and T. T. Perry, A Powder Technique for the Evaluation of Nonlinear Optical Materials., *J. Appl. Phys.*, 1968, **39**, 3798-3813.
3. O. V. Dolomanov, L. J. Bourhis, R. J. Gildea, J. A. K. Howard and H. Puschmann, OLEX2: a complete structure solution, refinement and analysis program, *J. Appl. Cryst.*, 2009, **42**, 339-341.
4. G. M. Sheldrick, Crystal structure refinement with SHELXL, *Acta Cryst.*, 2015, **C71**, 3-8.
5. A. L. Spek, Single-crystal structure validation with the program PLATON, *J. Appl. Cryst.*, 2003, **36**, 7–13.
6. M. D. Segall, P. J. D. Lindan, M. J. Probert, C. J. Pickard, P. J. Hasnip, S. J. Clark and M. C. Payne, First-principles simulation: ideas, illustrations and the CASTEP code, *Phys-Condens Mat.*, 2002, **14**, 2717-2744.
7. V. Milman, B. Winkler, J. A. White, C. J. Pickard, M. C. Payne, E. V. Akhmatkaya and R. H. Nobes, Electronic structure, properties, and phase stability of inorganic crystals: A pseudopotential plane-wave study, *Int. J. Quantum. Chem.*, 2000, **77**, 895-910.
8. J. P. Perdew, K. Burke and M. Ernzerhof, Generalized Gradient Approximation Made Simple, *Phys. Rev. Lett.*, 1996, **77**, 3865-3868.
9. C. Aversa and J. E. Sipe, Nonlinear optical susceptibilities of semiconductors: Results with a length-gauge analysis, *Phys. Rev. B*, 1995, **52**, 14636-14645.
10. J. Lin, M.-H. Lee, Z.-P. Liu, C. Chen and C. J. Pickard, Mechanism for linear and nonlinear optical effects in  $\beta$ -BaB<sub>2</sub>O<sub>4</sub> crystals, *Phys. Rev. B*, 1999, **60**, 13380-13389.
11. S. N. Rashkeev, W. R. L. Lambrecht and B. Segall, Efficientab initiomethod for the calculation of frequency-dependent second-order optical response in semiconductors, *Phys. Rev. B*, 1998, **57**, 3905-3919.
12. D. Vanderbilt, Soft self-consistent pseudopotentials in a generalized eigenvalue formalism, *Phys. Rev. B*, 1990, **41**, 7892-7895.
